# Supplementary material for: Prognostic prediction models for endovascular abdominal aortic aneurysm repair: protocol for a scoping review
Source: HighWire-hosted journal article supplement (doi:10.1136/bmjopen-2022-061420), 2022-10-01
Supplement: bmjopen-2022-061420supp005_data_supplement.pdf [file bmjopen-2022-061420supp005_data_supplement.pdf]

|   | Participants | Predictors | Outcome | Analysis | Participants | Predictors | Outcome | ROB | Applicability |
|---|--------------|------------|---------|----------|--------------|------------|---------|-----|---------------|
| 1 | +            | –          | ?       | +        | +            | +          | +       | –   | +             |
| 2 | +            | +          | +       | +        | +            | +          | +       | +   | +             |
| 3 | +            | +          | +       | ?        | –            | +          | +       | ?   | –             |
| 4 | –            | ?          | ?       | –        | +            | +          | –       | –   | –             |
| 5 | +            | +          | +       | +        | +            | ?          | +       | +   | ?             |
| 6 | +            | +          | +       | +        | ?            | +          | ?       | +   | ?             |
| 7 | ?            | ?          | +       | ?        | +            | +          | +       | ?   | +             |
| 8 | +            | +          | +       | +        | +            | +          | +       | +   | +             |

PROBAST = Prediction model Risk Of Bias ASsessment Tool; ROB = risk of bias.  
 \* + indicates low ROB/low concern regarding applicability; – indicates high ROB/high concern regarding applicability; and ? indicates unclear ROB/unclear concern regarding applicability.
